# Supplementary figures and images for: Extrinsic Ecological Factors and Intrinsic Genetic Features are Associated with Ecological Generalism in Pathogenic Tick-Borne Viruses
Source: Research Square preprint supplement (doi:10.21203/rs.3.rs-7258590/v1), 2025-08-28

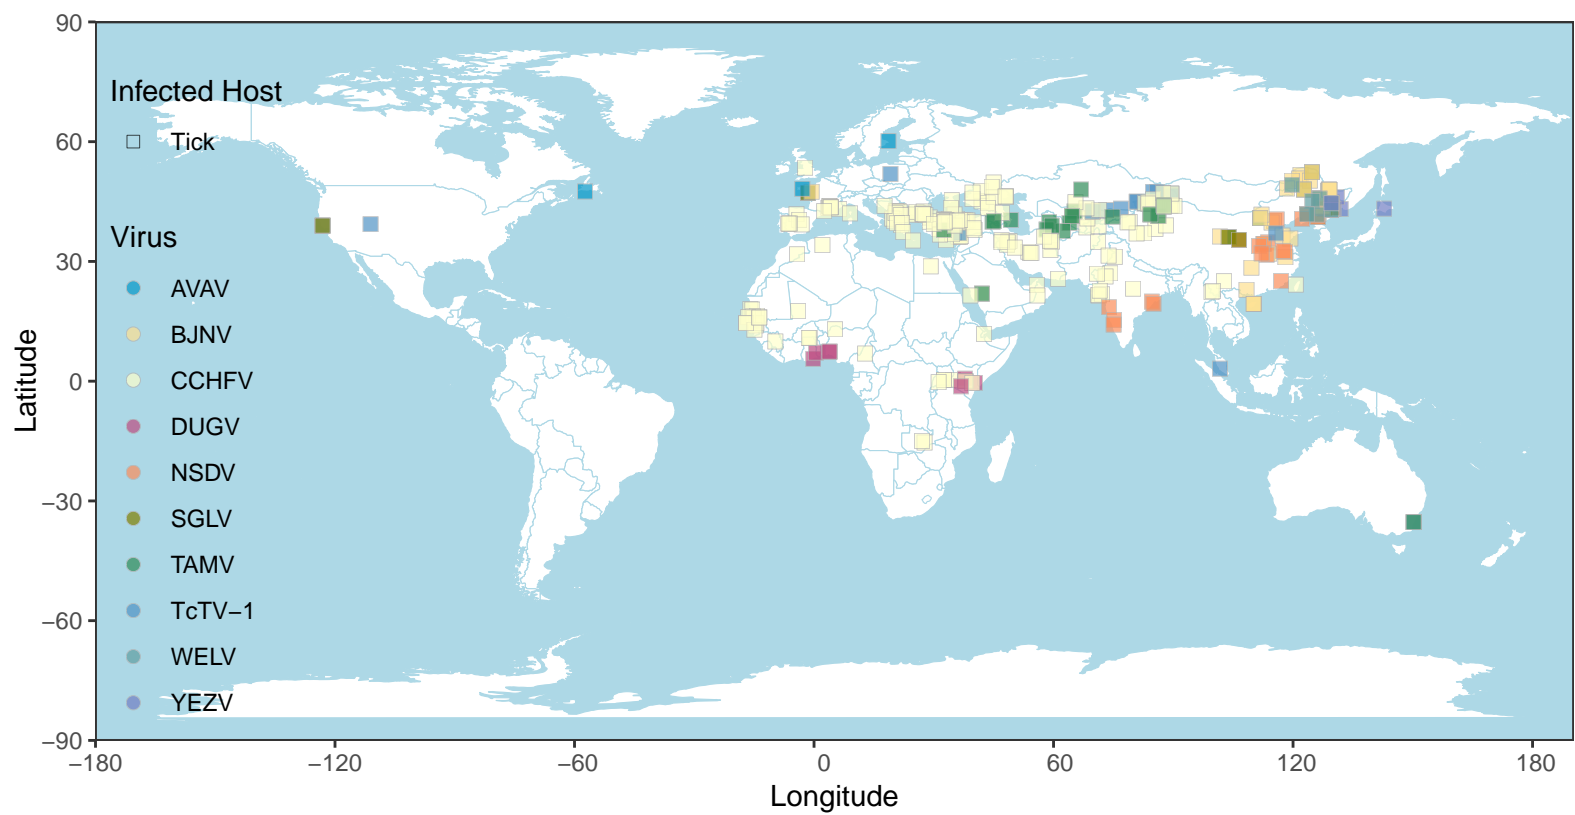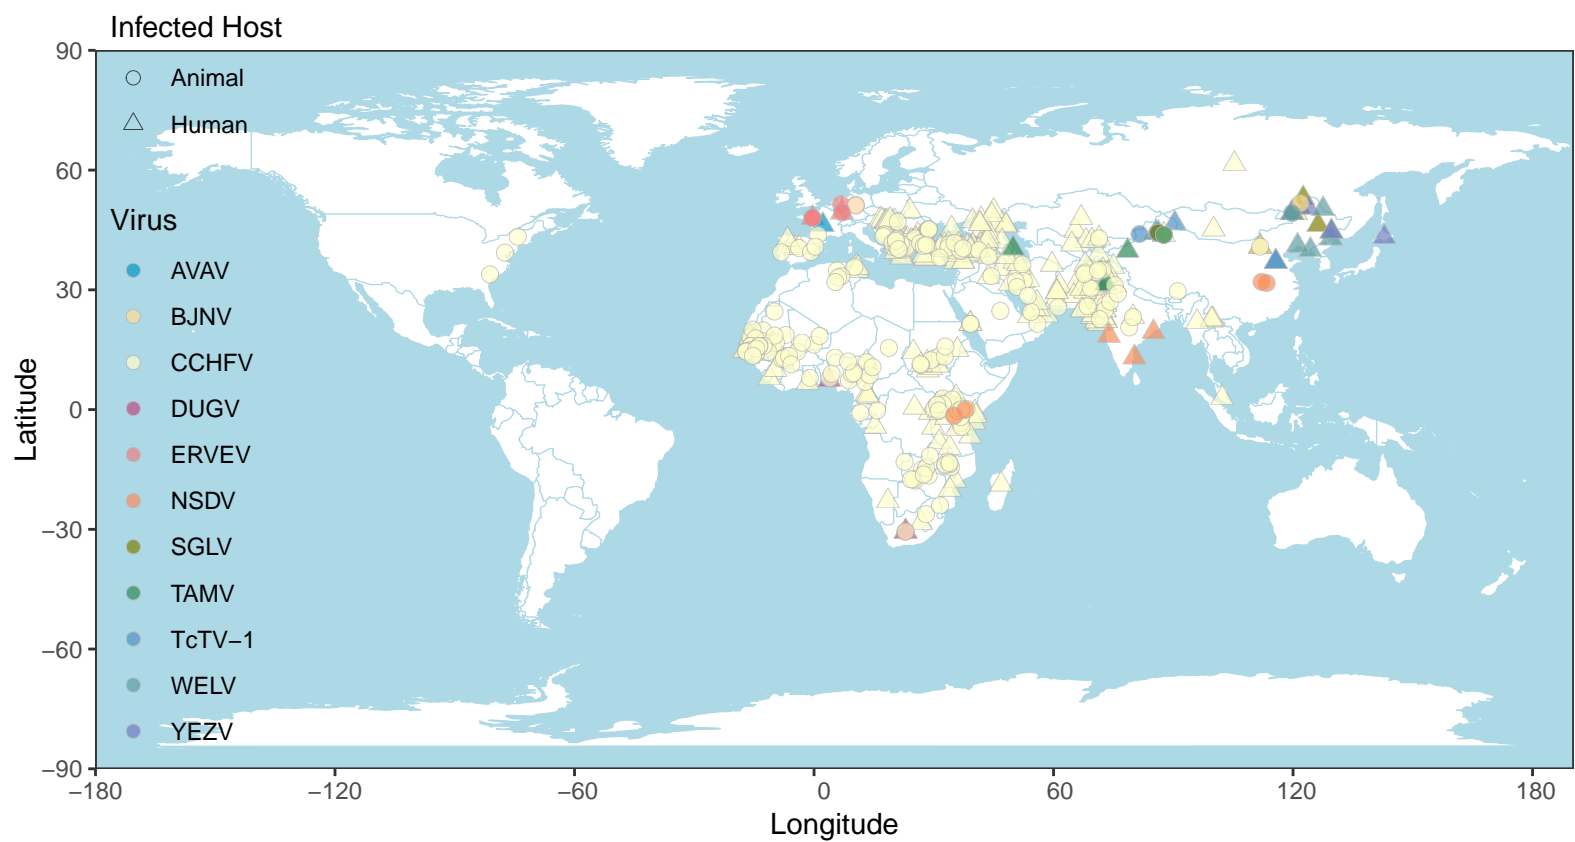

Supplement: Supplementary file 1 [file dc97af3f8afb0923952ff792.pdf]

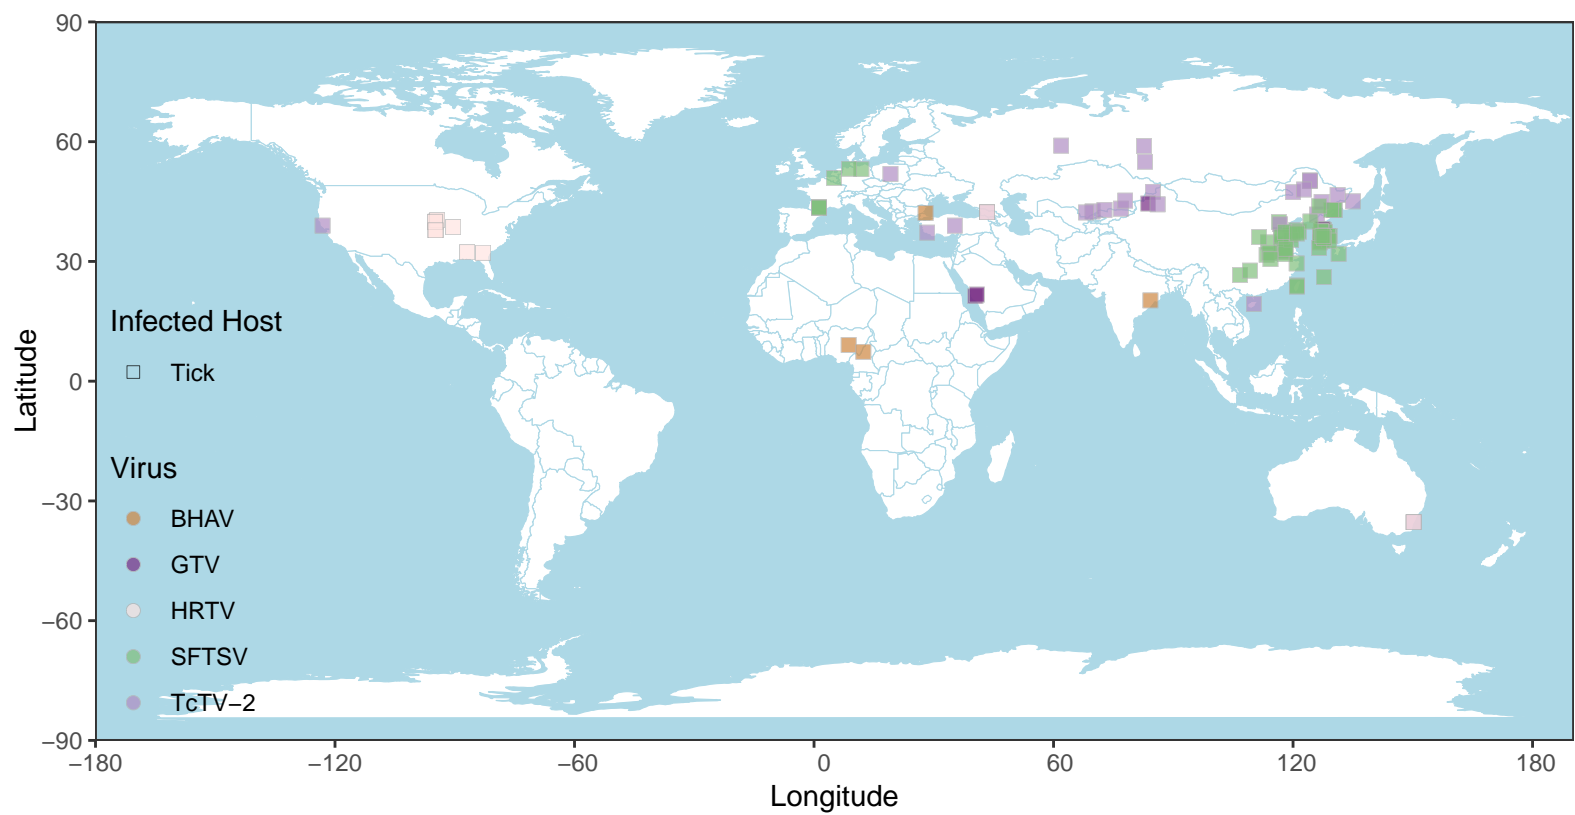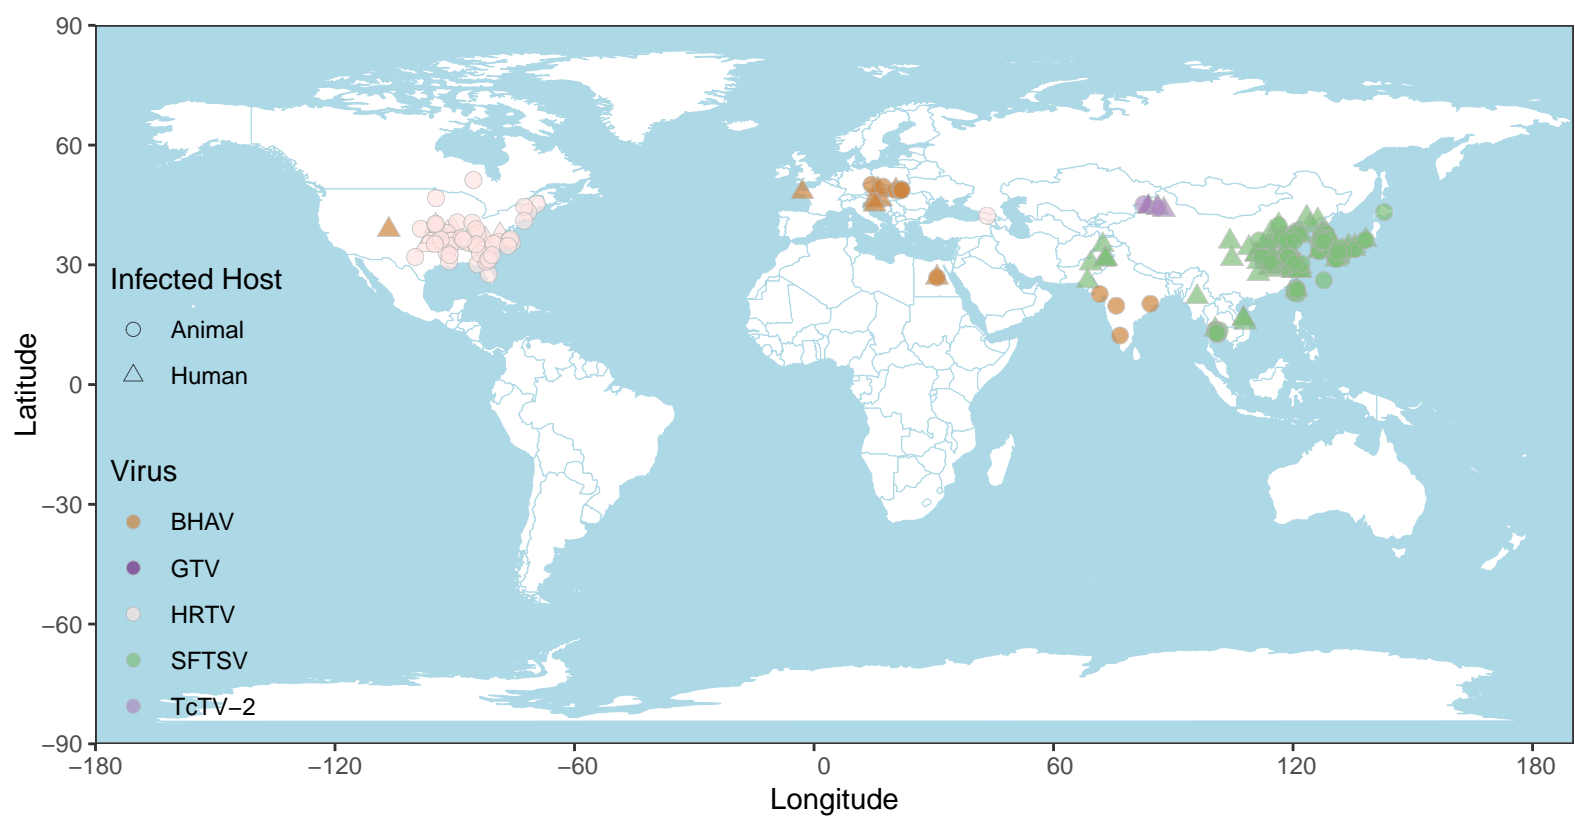

Supplement: Supplementary file 2 [file e5280ecec13d371794194e10.pdf]
